# Supplementary material for: Arsenic preconcentration viasolid phase extraction and speciation by HPLC-gradient hydride generation atomic absorption spectrometry
Source: Royal Society of Chemistry journal article supplement (doi:10.1039/c0ja00091d), 2010-11-16
Supplement: c0ja00091d.pdf [file c0ja00091d.pdf]

## Supporting Information

**Table S1.** Operating parameters of the liquid chromatographic separation-gradient hydride generation-QFAAS detection system.

|                           |                                                                                                                                                                                                                                                                                                                                                                                                                        |
|---------------------------|------------------------------------------------------------------------------------------------------------------------------------------------------------------------------------------------------------------------------------------------------------------------------------------------------------------------------------------------------------------------------------------------------------------------|
| <b>LC separation</b>      | Column: Develosil RPAQUEOUS-AR-5, $\Phi 6 \times 250$ mm and $\Phi 6 \times 150$ mm;<br>Mobile phase: 5 mmol L <sup>-1</sup> sodium 1-butanefulfonate, 4 mmol L <sup>-1</sup> malonic acid, 4 mmol L <sup>-1</sup> tetramethylammonium hydroxide, 0.1 % methanol, 10 mmol L <sup>-1</sup> ammonium tartrate, pH 2.<br>Flow rate: 1.0 mL min <sup>-1</sup> ;<br>Column temperature: 25°C;<br>Sample volume: 20 $\mu$ L. |
| <b>Hydride generation</b> | 1% NaBH <sub>4</sub> (m/v, in 0.5% NaOH); 6 mol L <sup>-1</sup> HCl (with 2% L-cysteine (m/v)) for As(V) and MMA; 0.6 mol L <sup>-1</sup> (with 2% L-cysteine (m/v)) for DMA.<br>A same flow rate of 1.1 mL min <sup>-1</sup> was used for both HCl and NaBH <sub>4</sub> solutions.<br>An argon flow rate of 50 mL min <sup>-1</sup> was employed as carrier gas.                                                     |
| <b>AAS condition</b>      | Wavelength: 193.7 nm; Lamp current: 12 mA; Burner height: 10.0 mm; Slit width: 1.3 nm; Flame type: air-acetylene; Acetylene flow rate: 1.2 L min <sup>-1</sup> ; PMT voltage: 500 V; Air pressure: 160 kPa; Air flow rate: 15.0 L min <sup>-1</sup> ; Reading mode: Peak height.                                                                                                                                       |

**Table S2.** The GFAAS temperature program for the determination of arsenic

| Step        | Temperature (°C) | Ramp (s) | Hold (s) | Argon flow rate (mL min <sup>-1</sup> ) |
|-------------|------------------|----------|----------|-----------------------------------------|
| Preheating  | 80               | 5        | 15       | 200                                     |
| Drying      | 120              | 5        | 15       | 200                                     |
| Pyrolysis   | 800              | 10       | 20       | 200                                     |
| Atomization | 2500             | 0        | 5        | 0                                       |
| Cleaning    | 2800             | 0        | 4        | 200                                     |
